# Supplementary material for: Recovery of heat shock-triggered released apoplastic Ca2+ accompanied by pectin methylesterase activity is required for thermotolerance in soybean seedlings
Source: PubMed Central journal article supplement — J Exp Bot. 2010 May 5;61(10):2843–52. doi: 10.1093/jxb/erq121 (PMC2882276; doi:10.1093/jxb/erq121), 2010-05-05
Supplement: erq121_1.pdf [file erq121_1.pdf]

**Title: Recovery of Apoplastic Ca<sup>2+</sup> Released by Heat Shock Accompanied by Pectin Methylesterase Activity Is Required for Thermotolerance in Soybean Seedlings**

**Authors:** *Hui-Chen Wu<sup>1</sup>, Shih-Feng Hsu<sup>1</sup>, Dan-Li Luo<sup>1</sup>, Shiang-Jiuun Chen<sup>1</sup>, Wen-Dar Huang<sup>2</sup>, Hsu-Sheng Lur<sup>2</sup> and Tsung-Luo Jinn<sup>1,\*</sup>*

**Supplementary Table S1.** Thermotolerance is lost in the presence of EGTA during recovery from HS and is restored by adding Ca<sup>2+</sup>, Sr<sup>2+</sup> or Ba<sup>2+</sup>. Thermotolerance is lost in the presence of EGTA during the recovery from HS and is restored by adding Ca<sup>2+</sup>, Sr<sup>2+</sup> or Ba<sup>2+</sup> in soybean seedlings. Two-d-old soybean seedlings were treated as indicated by treatments 1 to 12 shown in Fig. 1A. After treatment, seedlings were replanted in moist paper towels and grown at 28°C in a dark growth chamber for an additional 72 h; the length of seedlings was measured at the indicated times. The data represent means ± SD from 3 independent replicates, and 30 seedlings were investigated for each replicate. \* Indicates the treatment is lethal.

### Supplementary Data

| Treatment                                          | Length (cm)   |           |            | % of Seedlings after 72 h<br>at Following Range (cm) |        |     |
|----------------------------------------------------|---------------|-----------|------------|------------------------------------------------------|--------|-----|
|                                                    | 24 h          | 48 h      | 72 h       | < 5                                                  | 5 to 7 | > 7 |
|                                                    | <b>1.</b> 28C | 4.0 ± 0.3 | 8.6 ± 0.5  | 14.9 ± 0.5                                           | 0      | 0   |
| <b>2.</b> 28C+EGTA                                 | 3.8 ± 0.4     | 8.3 ± 0.5 | 12.7 ± 0.7 | 0                                                    | 0      | 100 |
| <b>3.</b> 40HS                                     | 3.8 ± 0.3     | 7.0 ± 0.3 | 13.6 ± 0.7 | 0                                                    | 0      | 100 |
| <b>4.</b> 40HS → 28C+EGTA                          | 3.3 ± 0.4     | 6.0 ± 0.3 | 10.8 ± 0.7 | 0                                                    | 68     | 32  |
| <b>5.</b> 40HS → 28C → 45HS                        | 3.2 ± 0.4     | 4.5 ± 0.4 | 7.5 ± 0.4  | 0                                                    | 92     | 8   |
| <b>6.</b> 40HS → 28C+EGTA → 45HS *                 | 2.5 ± 0.3     | 2.6 ± 0.3 | 2.6 ± 0.3  | 100                                                  | 0      | 0   |
| <b>7.</b> 40HS → 28C+EGTA+Ca <sup>2+</sup> → 45HS  | 2.9 ± 0.2     | 4.3 ± 0.3 | 6.9 ± 0.5  | 0                                                    | 100    | 0   |
| <b>8.</b> 40HS → 28C+EGTA+Sr <sup>2+</sup> → 45HS  | 2.7 ± 0.2     | 4.2 ± 0.5 | 6.3 ± 0.3  | 0                                                    | 100    | 0   |
| <b>9.</b> 40HS → 28C+EGTA+Ba <sup>2+</sup> → 45HS  | 2.7 ± 0.3     | 4.2 ± 0.2 | 6.1 ± 0.2  | 0                                                    | 100    | 0   |
| <b>10.</b> 40HS → 28C+EGTA+Mg <sup>2+</sup> → 45HS | 2.3 ± 0.3     | 3.0 ± 0.4 | 3.7 ± 0.5  | 83                                                   | 17     | 0   |
| <b>11.</b> 40HS → 28C+EGTA+K <sup>+</sup> → 45HS * | 1.5 ± 0.3     | 2.2 ± 0.4 | 2.3 ± 0.3  | 100                                                  | 0      | 0   |
| <b>12.</b> 45HS *                                  | 1.5 ± 0.4     | 2.3 ± 0.3 | 2.4 ± 0.3  | 100                                                  | 0      | 0   |
